# Supplementary material for: Identification of Novel Choroidal Neovascularization‐Related Genes Using Laplacian Heat Diffusion Algorithm
Source: Hindawi journal article supplement (doi:10.1155/2021/2295412), 2021-01-01
Supplement: f1 [file 2295412.f1.zip]

**Table S1:** Curated CNV-associated genes

|    |           |
|----|-----------|
| 1  | APOE      |
| 2  | CLU       |
| 3  | CRABP1    |
| 4  | CRYAA     |
| 5  | CRYBB2    |
| 6  | CRYGD     |
| 7  | CTGF      |
| 8  | CX3CR1    |
| 9  | EFEMP1    |
| 10 | EIF4H     |
| 11 | FABP5     |
| 12 | FGG       |
| 13 | FN1       |
| 14 | FRZB      |
| 15 | GFAP      |
| 16 | HIST1H2AG |
| 17 | HLA-DRA   |
| 18 | HSPA5     |
| 19 | IG@       |
| 20 | LAP3      |
| 21 | LUM       |
| 22 | LUM       |
| 23 | MFAP4     |
| 24 | MMP9      |
| 25 | PLVAP     |
| 26 | RHO       |
| 27 | RLBP1     |
| 28 | RLBP1     |
| 29 | SEMA3B    |
| 30 | SPARC     |
| 31 | SPTB      |
| 32 | TAGLN     |
| 33 | TF        |
| 34 | TIMP1     |
| 35 | VCAM1     |
| 36 | VIM       |
| 37 | VWF       |
