# Supplementary material for: Identification of Novel Choroidal Neovascularization-Related Genes Using Laplacian Heat Diffusion Algorithm
Source: Biomed Res Int. 2021 Sep 6;2021:2295412. doi: 10.1155/2021/2295412 (PMC8440095; doi:10.1155/2021/2295412)
Supplement: Supplementary Materials — Table S1: curated CNV-associated genes. Table S2: measurements of genes in each step. [file 2295412.f1.zip]

Archive with 3 entries (2 files):
- 2295412.f1/Table S1.pdf
- 2295412.f1/Table S2.pdf
- 2295412.f1/
